# Supplementary material for: Copper-alloy catalysts: structural characterization and catalytic synergies
Source: Royal Society of Chemistry journal article supplement (doi:10.1039/d1cy00179e), 2021-01-01
Supplement: d1cy00179e1.pdf [file d1cy00179e1.pdf]

## Electronic Supplementary Information

### Copper-Alloy Catalysts: Structural Characterizations and Catalytic Synergies

Shanghong Zeng,<sup>\*ab</sup> Shiyao Shan,<sup>b</sup> Aolin Lu,<sup>b</sup> Shan Wang,<sup>b</sup> Dominic T Caracciolo,<sup>b</sup> Richard J Robinson,<sup>b</sup> Guojun Shang,<sup>b</sup> Lei Xue,<sup>a</sup> Yuansong Zhao,<sup>a</sup> Aiai Zhang,<sup>a</sup> Yang Liu,<sup>a</sup> Shangpeng Liu,<sup>a</sup> Ze Liu,<sup>a</sup> Fenghua Bai,<sup>a</sup> Jinfang Wu,<sup>a</sup> Hong Wang,<sup>c</sup> and Chuan-Jian Zhong<sup>\*b</sup>

a. Inner Mongolia Key Laboratory of Chemistry and Physics of Rare Earth Materials, School of Chemistry and Chemical Engineering, Inner Mongolia University, Hohhot, Inner Mongolia 010021, P.R. China. E-mail: zengshanghong@imu.edu.cn

b. Department of Chemistry, State University of New York at Binghamton, Binghamton, NY 13902, USA. E-mail: cjzhong@binghamton.edu

c. School of Chemical Engineering, Inner Mongolia University of Technology, Hohhot, Inner Mongolia, 010051, P.R. China.

**Table 1** Summary of Selected Examples of Copper-Alloy Catalysts in Terms of Methods, Structures and Reactions

| Catalyst                                            | Method                          | Morphology & Surface Composition                                                         | Catalytic reaction/mechanism                                                           | ref. |
|-----------------------------------------------------|---------------------------------|------------------------------------------------------------------------------------------|----------------------------------------------------------------------------------------|------|
| Au <sub>n</sub> Cu <sub>100-n</sub>                 | Wet chemical reduction          | Nanocubes (AuCu nanoparticles)                                                           | CO oxid/<br>Melting-resolidification                                                   | 1    |
| AuCu                                                | Co-deposition                   | Metallic films (AuCu alloy)                                                              | CO <sub>2</sub> RR/ D-band center shifts                                               | 2    |
| Fcc-AuCu                                            | Seed-mediated                   | Nanoparticles (Fcc-AuCu alloy→<br>CuO)                                                   | CO oxid/ Mars-van Krevelen                                                             | 3    |
| Fct-AuCu                                            | Seed-mediated                   | Nanoparticles (Fct-AuCu alloy→<br>CuO)                                                   | CO oxid/ Mars-van Krevelen                                                             | 3    |
| AuCu                                                | Wet chemical                    | Nanoparticles (Cu, Au)                                                                   | CO <sub>2</sub> RR/ Three atomic gold<br>layers                                        | 4    |
| Au thin layer<br>on Cu                              | Galvanic<br>displacement        | Lamella structure (Au-Cu alloy,<br>Cu)                                                   | CO <sub>2</sub> RR/ Au thin layer                                                      | 5    |
| Pt <sub>32</sub> Cu <sub>68</sub>                   | Wet chemical                    | Nanowires (PtCu alloy)                                                                   | CH <sub>3</sub> OH Oxid/ PtCu<br>nanowires site                                        | 6    |
| Pt-Cu single -<br>atom                              | Galvanic<br>replacement         | Nanoparticles (Pt, Cu)                                                                   | CO oxid/ Pt-Cu single-atom<br>alloy                                                    | 7    |
| Pt-Ni-Cu                                            | Wet chemical                    | Nanoparticles (Pt, Ni, Cu)                                                               | ORR/ Extra bi-functional                                                               | 8    |
| Pd <sub>n</sub> Cu <sub>100-n</sub>                 | Wet chemical                    | Spherical particles (Pd-Cu alloy,<br>Cu <sub>x</sub> O)                                  | CO oxid/ Catalytic synergy                                                             | 9    |
| PdCu/C                                              | Wet chemical                    | Nanoparticles (Cu <sup>0</sup> , Cu <sup>2+</sup> , Pd <sup>0</sup> , Pd <sup>2+</sup> ) | ORR/ Nanostructural tuning                                                             | 10   |
| Pd <sub>n</sub> Cu <sub>100-n</sub>                 | Wet chemical<br>reduction       | Nanoparticles (PdCu alloy)                                                               | CO oxid/<br>Langmuir-Hinshelwood                                                       | 11   |
| Pd-Cu                                               | Co-impregnation                 | Nanoparticles (PdCu alloy phase)                                                         | CO <sub>2</sub> to CH <sub>3</sub> OH/ H-shuttled<br>DOM/ Isolated Pd in Cu<br>surface | 12   |
| Pd/Cu(111)                                          | --                              | Layer (Pd, Cu)                                                                           | CO <sub>2</sub> to CH <sub>4</sub> / Paired Cu-Pd<br>sites                             | 13   |
| Pd <sub>x</sub> Cu <sub>1-y</sub> -TiO <sub>2</sub> | Wet chemical                    | PdCu nanocrystal (Pd <sup>0</sup> , Cu <sup>0</sup> )                                    | CO <sub>2</sub> RR/ Alloying Cu with Pd                                                | 14   |
| Cu-Pd                                               | Colloidal<br>synthesis          | Spherical (Cu-Pd nanoparticles)                                                          | CO oxid/<br>Langmuir-Hinshelwood                                                       | 15   |
| Ru <sub>0.5</sub> Cu <sub>0.5</sub>                 | Solution-phase co-<br>reduction | Nanoparticles (RuCu alloy and bulk<br>Cu)                                                | CO oxid/<br>Langmuir-Hinshelwood                                                       | 16   |
| CuAg                                                | Electro-deposition              | Wire-like (Cu)                                                                           | CO <sub>2</sub> RR/ Cu <sub>2</sub> O overlayer and<br>Ag                              | 17   |
| CoCu/SiO <sub>2</sub>                               | Wetness co-<br>impregnation     | CoCu nanoalloy                                                                           | FTS / CoCu covered by Cu                                                               | 18   |
| CuCo                                                | Deposition                      | 2D islands (Co substituting Cu<br>clusters)                                              | CO adsorption/ Bimetallic<br>CuCo                                                      | 19   |
| CuIn                                                | Wet chemical                    | Nanowires (In, In <sup>3+</sup> , Cu, Cu <sup>2+</sup> )                                 | CO <sub>2</sub> RR/ Cu-In interface                                                    | 20   |
| Cu-In                                               | Deposition                      | Large irregularly shaped grains (In,<br>Cu)                                              | CO <sub>2</sub> RR/ In located on the<br>edge sites                                    | 21   |
| Cu atom-pair                                        | Wet chemical                    | Nanowires (Cu <sub>1</sub> <sup>0</sup> -Cu <sub>1</sub> <sup>x+</sup> pair)             | CO <sub>2</sub> RR/ Biatomic activating                                                | 22   |
| CuSn                                                | Co-deposition                   | Nanoparticles (CuSn alloy)                                                               | CO <sub>2</sub> RR/ Alloying Cu and Sn                                                 | 23   |
| Cu <sub>2-x</sub> Se(y)                             | Solvothermal<br>synthesis       | Nanoparticles (Cu, Cu(I), Cu(II),<br>Se)                                                 | CO <sub>2</sub> RR/ Cu active sites                                                    | 24   |

|                         |                                            |                                                                                                           |                                           |         |
|-------------------------|--------------------------------------------|-----------------------------------------------------------------------------------------------------------|-------------------------------------------|---------|
| Zn/Cu                   | Deposition                                 | Layer (ZnO <sub>x</sub> , ZnCu alloy)                                                                     | CO <sub>2</sub> RR/ Zn/Cu(997) step sites | 25      |
| Ni-Cu/CeO <sub>2</sub>  | Wet chemical                               | Nanoparticles (Cu <sup>2+</sup> , Cu <sup>+</sup> /Cu <sup>0</sup> , Ni <sup>0</sup> , Ni <sup>2+</sup> ) | HT-WGS/ One-site carboxyl                 | 26      |
| CH <sub>3</sub> OH oxid | oxidation of methanol;                     | CO oxid                                                                                                   | oxidation of carbon monoxide;             | CO-PROX |
|                         | preferential oxidation of carbon monoxide; | CO <sub>2</sub> RR                                                                                        | reduction reaction of carbon dioxide;     | ORR     |
|                         | oxygen reduction reaction; Oxid            | oxidation.                                                                                                |                                           |         |

## References:

1. Yin, J.; Shan, S.; Yang, L.; Mott, D.; Malis, O.; Petkov, V.; Cai, F.; Shan Ng, M.; Luo, J.; Chen, B. H.; Engelhard, M.; Zhong, C.-J. Gold-Copper Nanoparticles: Nanostructural Evolution and Bifunctional Catalytic Sites. *Chem. Mater.* **2012**, *24*, 4662-4674.
2. Liu, K.; Ma, M.; Wu, L.; Valenti, M.; Cardenas-Morcoso, D.; Hofmann, J. P.; Bisquert, J.; Gimenez, S.; Smith, W. A. Electronic Effects Determine the Selectivity of Planar Au-Cu Bimetallic Thin Films for Electrochemical CO<sub>2</sub> Reduction. *ACS Appl. Mater. Inter.* **2019**, *11*, 16546-16555.
3. Zhan, W.; Wang, J.; Wang, H.; Zhang, J.; Liu, X.; Zhang, P.; Chi, M.; Guo, Y.; Guo, Y.; Lu, G.; Sun, S.; Dai, S.; Zhu, H.; Crystal Structural Effect of AuCu Alloy Nanoparticles on Catalytic CO Oxidation. *J. Am. Chem. Soc.* **2017**, *139*, 8846-8854.
4. Kim, D.; Xie, C.; Becknell, N.; Yu, Y.; Karamad, M.; Chan, K.; Crumlin, E. J.; Nørskov, J. K.; Yang, P. Electrochemical Activation of CO<sub>2</sub> through Atomic Ordering Transformations of AuCu Nanoparticles. *J. Am. Chem. Soc.* **2017**, *139*, 8329-8336.
5. Kim, J.-H.; Woo, H.; Yun, S.-W.; Jung, H.-W.; Back, S.; Jung, Y.; Kim, Y.-T. Highly Active and Selective Au Thin Layer on Cu Polycrystalline Surface Prepared by Galvanic Displacement for the Electrochemical Reduction of CO<sub>2</sub> to CO. *Appl. Catal., B: Environ.* **2017**, *213*, 211-215.
6. Liao, Y.; Yu, G.; Zhang, Y.; Guo, T.; Chang, F.; Zhong, C.-J.; Composition-Tunable PtCu Alloy Nanowires and Electrocatalytic Synergy for Methanol Oxidation Reaction. *J. Phys. Chem. C* **2016**, *120*, 10476-10484.
7. Liu, J.; Lucci, F. R.; Yang, M.; Lee, S.; Marcinkowski, M. D.; Therrien, A. J.; Williams, C. T.; Sykes, E. C. H.; Flytzani-Stephanopoulos, M. Tackling CO Poisoning with Single-Atom Alloy Catalysts. *J. Am. Chem. Soc.* **2016**, *138*, 6396-6399.
8. Petkov, V.; Maswadeh, Y.; Zhao, Y.; Lu, A.; Cronk, H.; Chang, F.; Shan, S.; Kareem, H.; Luo, J.; Zhong, C.-J.; Shastri, S.; Kenesei, P. Nanoalloy Catalysts Inside Fuel Cells: An Atomic-Level Perspective on the Functionality by Combined in Operando X-ray Spectroscopy and Total Scattering. *Nano Energy* **2018**, *49*, 209-220.
9. Shan, S.; Petkov, V.; Prasai, B.; Wu, J.; Joseph, P.; Skeete, Z.; Kim, E.; Mott, D.; Malis, O.; Luo, J.; Zhong, C.-J. Catalytic Activity of Bimetallic Catalysts Highly Sensitive to the Atomic Composition and Phase Structure at the Nanoscale. *Nanoscale* **2015**, *7*, 18936-18948.
10. Wu, Z.-P.; Shan, S.; Xie, Z.-H.; Kang, N.; Park, K.; Hopkins, E.; Yan, S.; Sharma, A.; Luo, J.; Wang, J.; Petkov, V.; Wang, L.; Zhong, C.-J. Revealing the Role of Phase Structures of Bimetallic Nanocatalysts in the Oxygen Reduction Reaction. *ACS Catal.* **2018**, *8*, 11302-11313.
11. Zhang, W.; Shan, S.; Luo, J.; Fisher, A.; Chen, J.-F.; Zhong, C.-J.; Zhu, J.; Cheng, D. Origin of Enhanced Activities for CO Oxidation and O<sub>2</sub> Reaction over Composition-Optimized Pd<sub>50</sub>Cu<sub>50</sub> Nanoalloy Catalysts. *J. Phys. Chem. C* **2017**, *121*, 11010-11020.
12. Nie, X.; Jiang, X.; Wang, H.; Luo, W.; Janik, M. J.; Chen, Y.; Guo, X.; Song, C. Mechanistic Understanding of Alloy Effect and Water Promotion for Pd-Cu Bimetallic Catalysts in CO<sub>2</sub> Hydrogenation to Methanol. *ACS Catal.* **2018**, *8*, 4873-4892.
13. Boucher, M. B.; Marcinkowski, M. D.; Liriano, M. L.; Murphy, C. J.; Lewis, E. A.; Jewell, A. D.; Mattera, M. F. G.; Kyriakou, G.; Flytzani-Stephanopoulos, M.; Sykes, E. C. H. Molecular-Scale Perspective of Water-Catalyzed Methanol Dehydrogenation to Formaldehyde. *ACS Nano* **2013**, *7*, 6181-6187.
14. Long, R.; Li, Y.; Liu, Y.; Chen, S.; Zheng, X.; Gao, C.; He, C.; Chen, N.; Qi, Z.; Song, L.; Jiang, J.; Zhu, J.; Xiong, Y. Isolation of Cu Atoms in Pd Lattice: Forming Highly Selective Sites for Photocatalytic Conversion of CO<sub>2</sub> to CH<sub>4</sub>. *J. Am. Chem. Soc.* **2017**, *139*, 4486-4492.
15. Mun, Y.; Lee, S.; Cho, A.; Kim, S.; Han, J. W.; Lee, J. Cu-Pd Alloy Nanoparticles as Highly Selective Catalysts for Efficient Electrochemical Reduction of CO<sub>2</sub> to CO. *Appl. Catal., B: Environ.* **2019**, *246*, 82-88.
16. Huang, B.; Kobayashi, H.; Yamamoto, T.; Matsumura, S.; Nishida, Y.; Sato, K.; Nagaoka, K.; Kawaguchi, S.; Kubota, Y.; Kitagawa, H. Solid-Solution Alloying of Immiscible Ru and Cu with Enhanced CO Oxidation Activity. *J. Am. Chem. Soc.* **2017**, *139*, 4643-4646.
17. Hoang, T. T. H.; Verma, S.; Ma, S.; Fister, T. T.; Timoshenko, J.; Frenkel, A. I.; Kenis, P. J. A.; Gewirth, A. A. Nanoporous Copper-Silver Alloys by Additive-Controlled Electrodeposition for the

- Selective Electroreduction of CO<sub>2</sub> to Ethylene and Ethanol. *J. Am. Chem. Soc.* **2018**, *140*, 5791-5797.
18. Su, J.; Zhang, Z.; Fu, D.; Liu, D.; Xu, X.-C.; Shi, B.; Wang, X.; Si, R.; Jiang, Z.; Xu, J.; Han, Y.-F. Higher Alcohols Synthesis from Syngas over CoCu/SiO<sub>2</sub> Catalysts: Dynamic Structure and the role of Cu. *J. Catal.* **2016**, *336*, 94-106.
  19. Eren, B.; Torres, D.; Karshoğlu, O.; Liu, Z.; Wu, C. H.; Stacchiola, D.; Bluhm, H.; Somorjai, G. A.; Salmeron, M. Structure of Copper–Cobalt Surface Alloys in Equilibrium with Carbon Monoxide Gas. *J. Am. Chem. Soc.* **2018**, *140*, 6575-6581.
  20. Luo, W.; Xie, W.; Mutschler, R.; Oveisi, E.; De Gregorio, G. L.; Buonsanti, R.; Züttel, A. Selective and Stable Electroreduction of CO<sub>2</sub> to CO at the Copper/Indium Interface. *ACS Catal.* **2018**, *8*, 6571-6581.
  21. Rasul, S.; Anjum, D. H.; Jedidi, A.; Minenkov, Y.; Cavallo, L.; Takanebe, K. A Highly Selective Copper–Indium Bimetallic Electrocatalyst for the Electrochemical Reduction of Aqueous CO<sub>2</sub> to CO. *Angew. Chem. Int. Ed.* **2015**, *54*, 2146-2150.
  22. Jiao, J.; Lin, R.; Liu, S.; Cheong, W.-C.; Zhang, C.; Chen, Z.; Pan, Y.; Tang, J.; Wu, K.; Hung, S.-F.; Chen, H. M.; Zheng, L.; Lu, Q.; Yang, X.; Xu, B.; Xiao, H.; Li, J.; Wang, D.; Peng, Q.; Chen, C.; Li, Y.; Copper Atom-pair Catalyst Anchored on Alloy Nanowires for Selective and Efficient Electrochemical Reduction of CO<sub>2</sub>. *Nat. Chem.* **2019**, *11*, 222-228.
  23. Zheng, X.; Ji, Y.; Tang, J.; Wang, J.; Liu, B.; Steinrück, H.-G.; Lim, K.; Li, Y.; Toney, M. F.; Chan, K.; Cui, Y. Theory-Guided Sn/Cu Alloying for Efficient CO<sub>2</sub> Electroreduction at Low Overpotentials. *Nat. Catal.* **2019**, *2*, 55-61.
  24. Yang, D.; Zhu, Q.; Chen, C.; Liu, H.; Liu, Z.; Zhao, Z.; Zhang, X.; Liu, S.; Han, B. Selective Electroreduction of Carbon Dioxide to Methanol on Copper Selenide Nanocatalysts. *Nat. Commun.* **2019**, *10*, 677.
  25. Koitaya, T.; Yamamoto, S.; Shiozawa, Y.; Yoshikura, Y.; Hasegawa, M.; Tang, J.; Takeuchi, K.; Mukai, K.; Yoshimoto, S.; Matsuda, I.; Yoshinobu, J. CO<sub>2</sub> Activation and Reaction on Zn-Deposited Cu Surfaces Studied by Ambient-Pressure X-ray Photoelectron Spectroscopy. *ACS Catal.* **2019**, *9*, 4539-4550.
  26. Saw, E. T.; Oemar, U.; Tan, X. R.; Du, Y.; Borgna, A.; Hidajat, K.; Kawi, S. Bimetallic Ni–Cu Catalyst Supported on CeO<sub>2</sub> for High-Temperature Water–Gas Shift Reaction: Methane Suppression via Enhanced CO Adsorption. *J. Catal.* **2014**, *314*, 32-46.
